# Supplementary material
Source: PubMed Central journal article supplement (PMC6980748)
Supplement: NIHMS1546088-supplement-1.pdf [file NIHMS1546088-supplement-1.pdf]

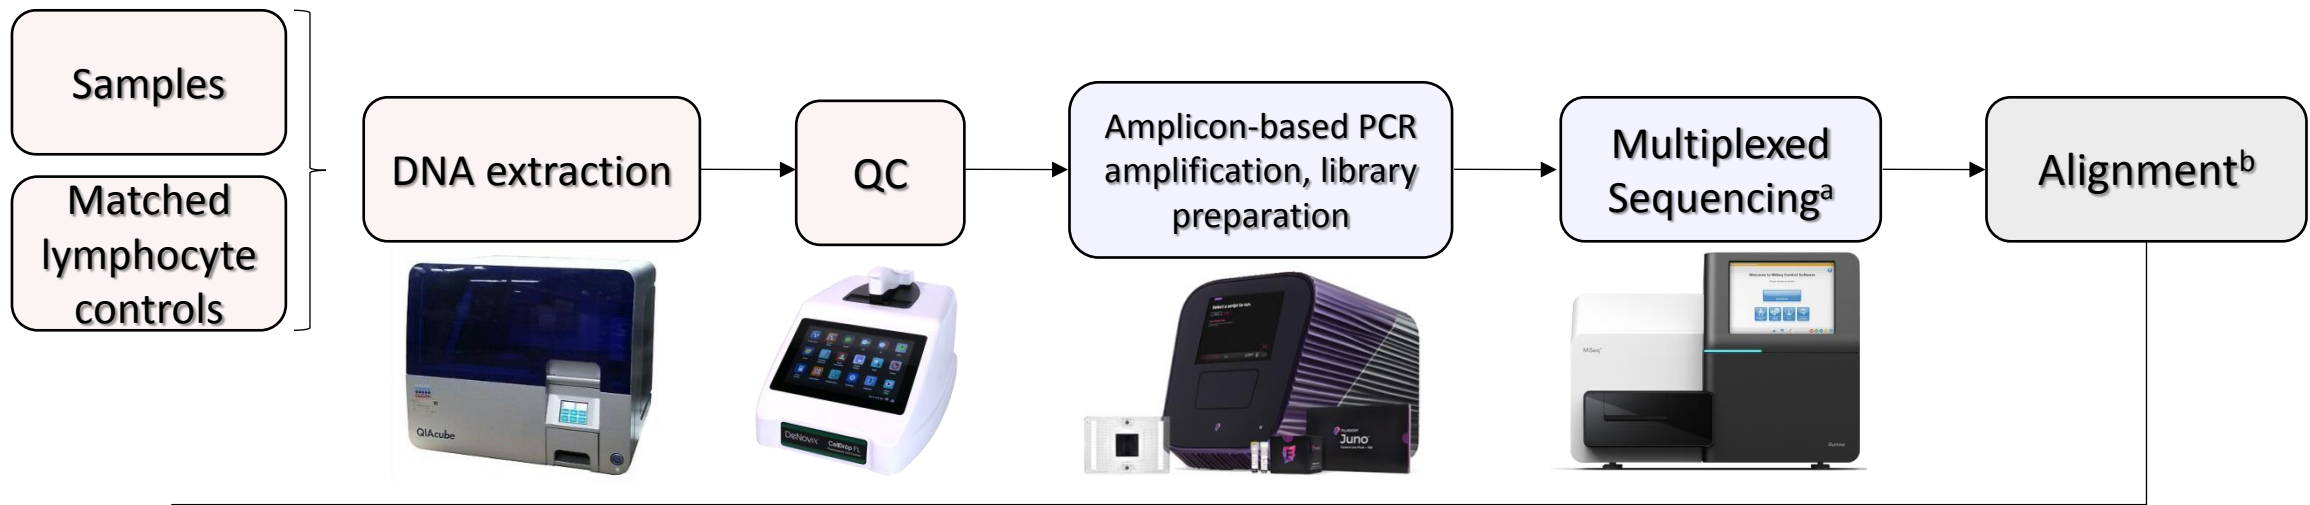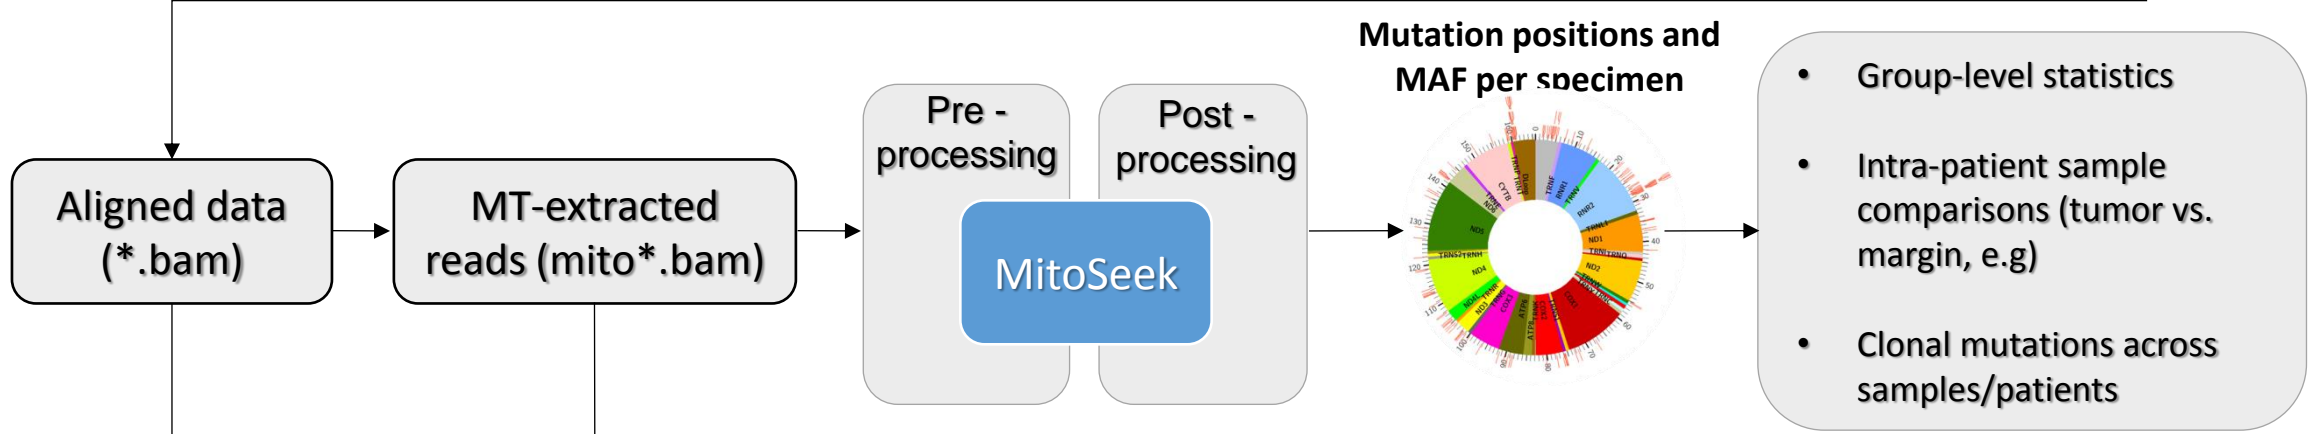

<sup>a</sup> includes barcoding and demultiplexing, as described in Methods

<sup>b</sup> using Bowtie2

<sup>c</sup> Read quality control (using FastQC), depth/coverage check

<sup>d</sup> Annotation of somatic mutations with sample data (sample type, patient, etc), check for missing values, annotation of variants, pathogenicity prediction

- Samples collection and processing
- Library preparation and sequencing
- Data processing and analysis

**Supplementary Figure 1**

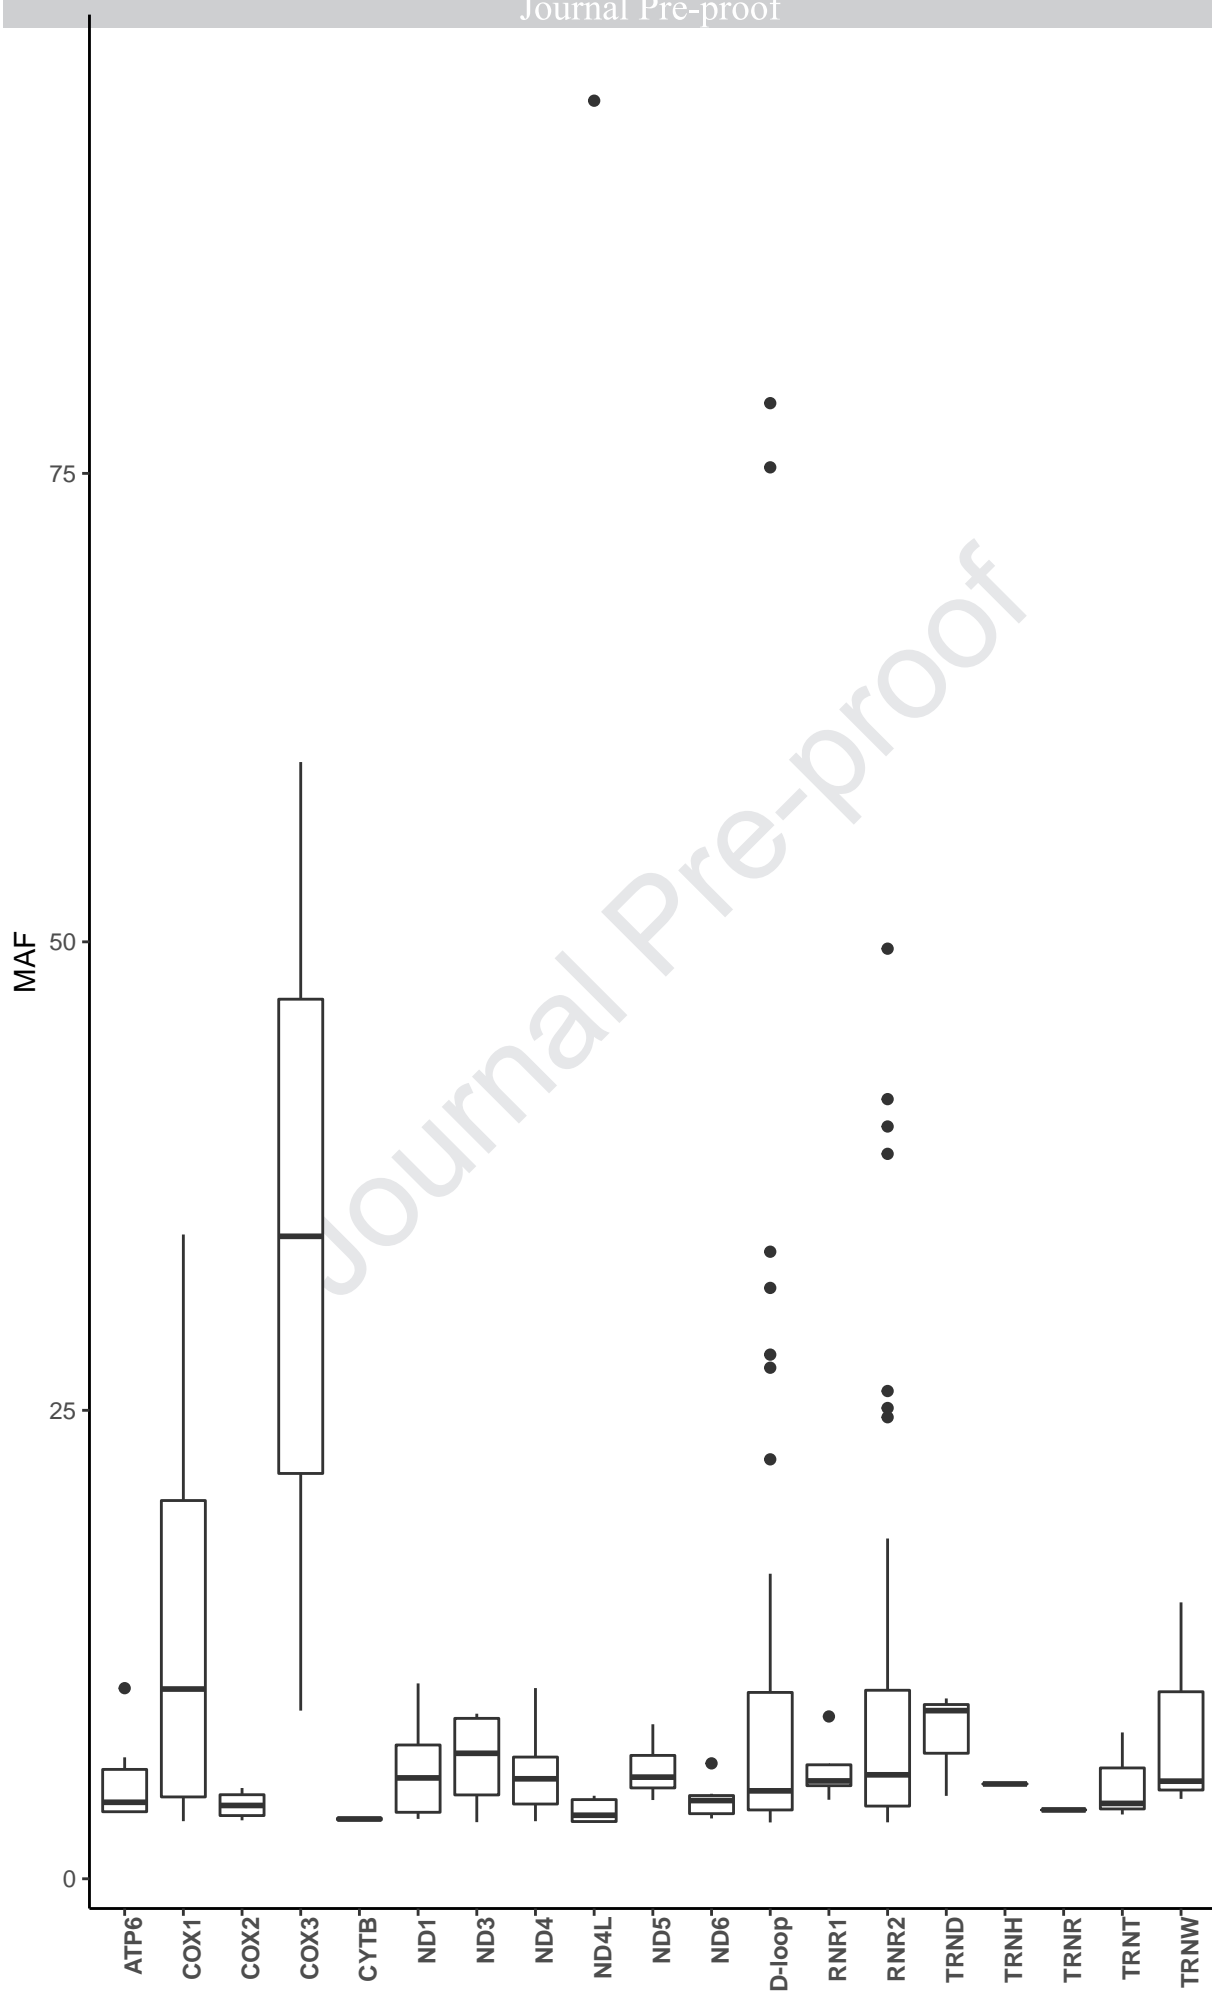

Supplementary Figure 2

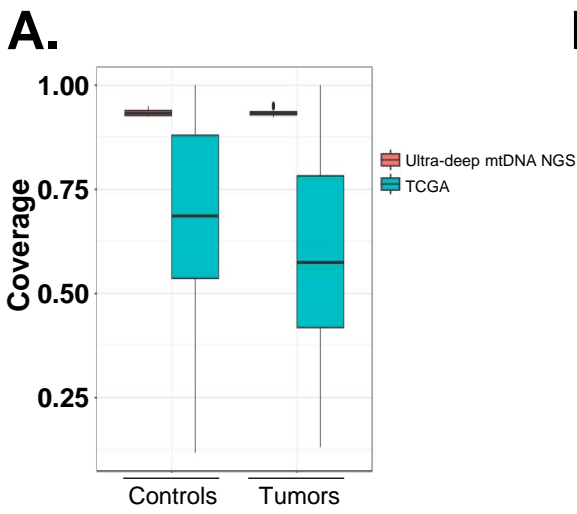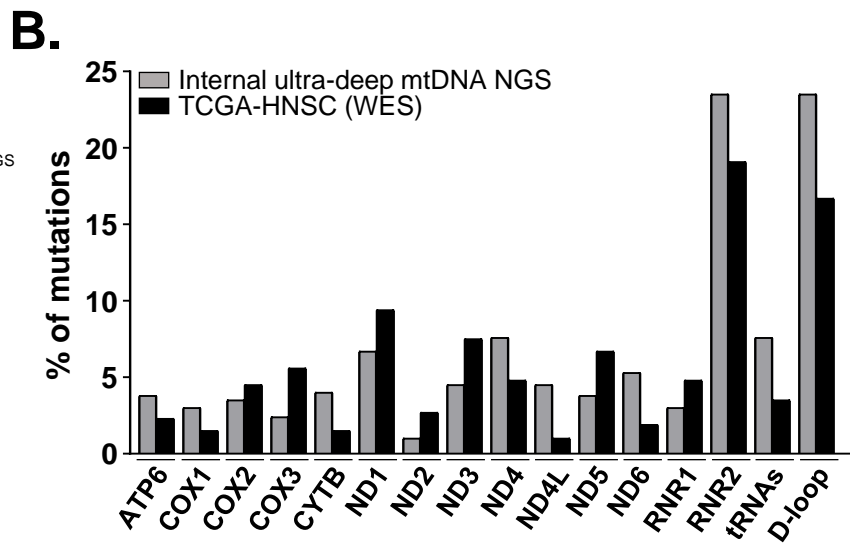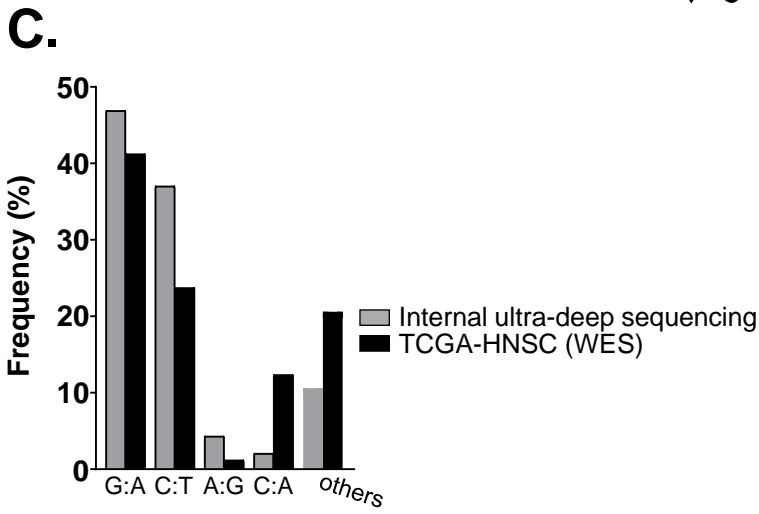

**Supplementary Figure 3**
